# Supplementary material for: Cytogenetic Profile in Monoclonal Gammopathy of Undetermined Significance, Smoldering and Symptomatic Multiple Myeloma: A Study of 1087 Patients with Highly Purified Plasma Cells
Source: MDPI journal article supplement (doi:10.3390/cancers15235690), 2023-12-02
Supplement: s1 [file s1]

Supplemental S1: Major Abnormal FISH Signal Patterns with Corresponding Abnormalities and Cut-off Values.

| <b>FISH probes/<br/>Signal patterns</b> | <b>Abnormality</b>                                       | <b>Cut-off (%)</b> |
|-----------------------------------------|----------------------------------------------------------|--------------------|
| <b><i>CDKN2C/CKS1B</i></b>              |                                                          |                    |
| 2R1G                                    | Loss of one copy of CDKN2C                               | <6.5               |
| 3R2G                                    | Gain of one copy of CKS1B                                | <9.9               |
| 4R2G                                    | Gain of two copies of CKS1B                              | <3.5               |
| 3R1G                                    | Gain of one copy of CKS1B and loss of one copy of CDKN2C | <1.4               |
| <b><i>IGH/FGFR3</i></b>                 |                                                          |                    |
| 1R1G2F                                  | IGH::FGFR3 rearrangement                                 | <0.5               |
| 3R2G                                    | Gain of one copy of FGFR3                                | <1.0               |
| 2R3G                                    | One extra signal of IGH or IGH rearrangement             | <3.0               |
| <b><i>MYC</i></b>                       |                                                          |                    |
| 1R1G1F                                  | MYC rearrangement                                        | <4.7               |
| 1R2F                                    | Gain of 5'MYC / MYC rearrangement                        | <0.7               |
| 3F                                      | Gain of one copy of MYC                                  | <4.0               |
| <b><i>CDKN2A/CEP9</i></b>               |                                                          |                    |
| 3R3G                                    | Trisomy 9                                                | <0.5               |
| 4R4G                                    | Tetrasomy 9                                              | <2.2               |
| 1R2G                                    | Loss of one copy of CDKN2A                               | <3.8               |
| <b><i>IGH/MYEOV-CCND1</i></b>           |                                                          |                    |
| 1R1G2F                                  | IGH::CCND1/MYEOV rearrangement                           | <0.5               |
| 3R2G                                    | Gain of one copy of MYEOV-CCND1                          | <3.8               |
| 2R3G                                    | One extra signal of IGH or IGH rearrangement             | <10.6              |
| <b><i>RB1/13q34</i></b>                 |                                                          |                    |
| 1R2G                                    | Loss of one copy of RB1                                  | <5.1               |
| 1R1G                                    | Monosomy 13                                              | <5.1               |
| <b><i>IGH/MAF</i></b>                   |                                                          |                    |
| 1R1G12F                                 | IGH::MAF rearrangement                                   | 0.0                |
| 2R3G                                    | One extra signal of IGH or IGH rearrangement             | <1.4               |
| 1R2G                                    | Loss of one copy of MAF                                  | <0.5               |
| <b><i>TP53/CEP17</i></b>                |                                                          |                    |
| 1R2G                                    | Loss of one copy of TP53                                 | <7.9               |
| 1R1G                                    | Monosomy 17                                              | <4.9               |
