# Supplementary material for: Cytogenetic Profile in Monoclonal Gammopathy of Undetermined Significance, Smoldering and Symptomatic Multiple Myeloma: A Study of 1087 Patients with Highly Purified Plasma Cells
Source: Cancers (Basel). 2023 Dec 2;15(23):5690. doi: 10.3390/cancers15235690 (PMC10705751; doi:10.3390/cancers15235690)
Supplement: Supplementary file 1 [file cancers-15-05690-s001.zip › Supplemental S2.xlsx]

## Sheet: Supplemental S2
Case	X	Y	1	2	3	4	5	6	7	8	9	10	11	12	13	14	15	16	17	18	19	20	21	22	mar	cp	tetra	Diag
1																										Y		SMM		Aneusomy (Gain)
2
3																									Y					Aneusomy (Loss)
4
5																									Y	Y				Structural (SV)
6																									Y	Y	Y
7																														Aneusomy+SV
8
9																									Y	Y
10																										Y
11
12
13																									Y	Y
14																										Y		NDMM
15
16																									Y	Y
17																									Y
18																									Y	Y
19
20
21
22																									Y	Y
23																									Y	Y
24																									Y	Y
25																									Y	Y
26																									Y	Y
27																									Y
28																										Y	Y
29																									Y	Y
30																									Y	Y
31																									Y
32																										Y
33																									Y
34
35																									Y	Y
36																									Y	Y
37																									Y	Y
38																									Y	Y
39																									Y	Y
40																									Y
41
42																									Y	Y
43
44																									Y	Y
45
46
47																									Y	Y
48																									Y	Y
49																										Y
50																									Y	Y
51																									Y	Y
52																									Y
53
54																									Y	Y
55																									Y
56																									Y	Y
57																									Y	Y
58
59																										Y	Y
60																									Y
61																									Y
62																									Y		Y	RRMM
63																									Y
64																										Y
65																									Y	Y
66																										Y	Y
67																									Y	Y
68																									Y	Y
69																										Y
70																									Y
71
72																									Y	Y	Y
73																										Y
74
75																									Y
76																									Y
77																										Y
78																										Y
79																										Y
80																									Y	Y
81																									Y	Y
82																									Y	Y
83																									Y	Y
84																									Y	Y
85																									Y	Y	Y
86																									Y	Y
87																									Y
88																									Y	Y
89																									Y	Y
90																									Y
91																									Y	Y
92																									Y
93																									Y
94																									Y
95
96																									Y	Y
97																									Y	Y
98																									Y	Y
99
100																									Y	Y
101
102																									Y	Y
103
104
105																									Y
106																										Y
107																									Y	Y
108																									Y	Y	Y
109																									Y	Y
110																									Y	Y
111																										Y	Y
112																										Y
113																										Y
114
115																										Y
116
117																									Y	Y
118																									Y	Y
119																									Y	Y
120																									Y		Y
121																									Y	Y
122																									Y	Y	Y
123
124																									Y	Y	Y
125																									Y	Y
126																									Y	Y
127
128																									Y
129																									Y	Y
130																									Y
131																										Y
132																										Y
133																									Y	Y
134
135																									Y	Y	Y
136																									Y	Y
137																									Y	Y
138																									Y	Y	Y
139																									Y	Y
140
141																									Y	Y	Y
142																									Y
143																									Y	Y
144																									Y	Y
145
146																									Y	Y
147																									Y	Y
148																									Y	Y
149																									Y	Y	Y
150																									Y
151																									Y	Y
152																									Y	Y
153
154																									Y	Y
155																									Y
156																									Y	Y	Y
157																									Y	Y
158																										Y
159																									Y	Y
160																									Y	Y
161
162																									Y	Y
163																									Y
Total	44	30	110	38	82	48	86	73	74	68	107	36	111	51	69	83	95	53	70	45	76	34	64	44	108	102	17
%	26.9939	18.4049	67.4847	23.3129	50.3067	29.4479	52.7607	44.7853	45.3988	41.7178	65.6442	22.0859	68.0982	31.2883	42.3313	50.9202	58.2822	32.5153	42.9448	27.6074	46.6258	20.8589	39.2638	26.9939	66.2577	62.5767	10.4294
